# Supplementary material
Source: publisher figshare collection journal article supplement (https://gsapubs.figshare.com/ndownloader/files/40838639)
Supplement: Supplementary file 1 [file 40838639]

## Sheet: Laiwu
Table S5. Major and trace elements of apatite from the Fe-mineralized and barren plutons in the Laiwu district
Point	Comment	SiO2	La2O3	Ce2O3	FeO	MnO	CaO	Na2O	SrO	P2O5	SO3	Cl	F	Total	fo2 (Mn calculate)1	Temperature (AST)	Logfo2 fmq2	ΔFMQ	Clmelt3	Ca	Sr	Fe	Mn	La	Ce	Na	Summe A	P	Si	S	Summe B	Cl	F	OH (calculated)	wt% H2O	O=F,Cl	Sr	Y	La	Ce	Pr	Nd	Sm	Eu	Gd	Tb	Dy	Ho	Er
Kuangshan		wt.%	wt.%	wt.%	wt.%	wt.%	wt.%	wt.%	wt.%	wt.%	wt.%	wt.%	wt.%	wt.%		K			ppm	a.p.f.u.	a.p.f.u.	a.p.f.u.	a.p.f.u.	a.p.f.u.	a.p.f.u.	a.p.f.u.	a.p.f.u.	a.p.f.u.	a.p.f.u.	a.p.f.u.	a.p.f.u.	a.p.f.u.	a.p.f.u.	a.p.f.u.			ppm	ppm	ppm	ppm	ppm	ppm	ppm	ppm	ppm	ppm	ppm	ppm	ppm
Ap1	SGG-2 AP	0.109	0.003	0.079	0.057	0	54.712	0.018	0.01	41.839	0.03	0.211	2.963	100.031	-9.75	1133.72	-13.5089	3.75892	2110	4.9735	0.000491967	0.00404438	0	9.38788e-05	0.00245383	0.002961	4.98305	3.00512	0.00924795	0.00191013	3.01646	0.0303396	0.79505	0.174611	0.308533	1.29525
Ap1	SGG-2 AP	0.042	0.008	0.201	0.048	0	55.019	0.135	0.137	41.607	0.123	0.863	2.448	100.631	-9.75	1133.72	-13.5089	3.75892	8630	4.96736	0.00669407	0.00338261	0	0.000248639	0.0062008	0.0220563	4.99925	2.96811	0.00353917	0.00777824	2.99406	0.123245	0.652391	0.224364	0.399164	1.22551	725.441	49.2984	540.753	818.252	73.1415	266.717	31.6111	4.55259	23.1662	2.10721	9.69139	1.64296	4.09773
Ap1	SGG-2 AP	0.088	0	0.125	0	0.055	54.45	0.048	0.072	42.533	0.041	1.251	2.302	100.965	-10.6873	1133.72	-13.5089	2.8216	12510	4.92874	0.00352717	0	0.00393575	0	0.00386622	0.00786257	4.9444	3.04204	0.00743463	0.00259947	3.05207	0.179119	0.615072	0.205808	0.365205	1.25159	584.572	207.751	614.783	1234.27	140.735	613.088	102.044	5.34317	78.6856	8.40265	41.5802	7.29702	17.3376
Ap1	SGG-2 AP	0.042	0.124	0.23	0	0	53.648	0.155	0.048	41.858	0.126	1.698	2.091	100.02	-9.75	1133.72	-13.5089	3.75892	16980	4.91751	0.00238117	0	0	0.00391274	0.00720375	0.0257104	4.95434	3.0316	0.00359319	0.00808957	3.04328	0.246194	0.565756	0.18805	0.329529	1.2636	494.864	25.1217	264.897	408.359	37.0873	140.616	16.7779	3.27364	12.456	1.14965	5.15809	0.870097	1.8651
Ap1	SGG-2 AP	0.024	0.02	0.169	0.024	0.019	54.308	0.124	0.156	41.619	0.111	1.477	2.274	100.325	-10.0738	1133.72	-13.5089	3.43512	14770	4.95398	0.00770144	0.00170883	0.00137016	0.00062804	0.00526764	0.0204691	4.98343	2.99974	0.00204334	0.00709213	3.00887	0.213117	0.6123	0.174583	0.307413	1.29079
Ap1	SGG-2 AP	0.096	0.119	0.188	0.088	0	53.759	0.184	0.098	42.675	0.162	0.954	2.34	100.663	-9.75	1133.72	-13.5089	3.75892	9540	4.87365	0.00480824	0.00622706	0	0.00371379	0.00582371	0.0301861	4.9196	3.05687	0.00812294	0.0102868	3.07559	0.136804	0.626184	0.237012	0.419931	1.20057
Ap1	SGG-2 AP	0.033	0.001	0.074	0.048	0.036	54.346	0.02	0.008	41.997	0.039	0.496	2.817	99.915	-10.3635	1133.72	-13.5089	3.1454	4960	4.95378	0.000394654	0.00341514	0.00259418	3.13788e-05	0.00230483	0.00329902	4.96543	3.02474	0.00280752	0.00248999	3.03418	0.0715152	0.757948	0.170537	0.300511	1.29808
Ap1	GJT-2 AP	0.036	0.008	0.093	0.127	0	53.891	0.036	0.042	42.152	0.076	0.376	2.906	99.743	-9.75	1133.72	-13.5089	3.75892	3760	4.92656	0.00207794	0.0090621	0	0.000251759	0.00290502	0.00595546	4.94473	3.04471	0.00307163	0.00486636	3.05319	0.0543704	0.784163	0.161467	0.283705	1.30848
Ap1	GJT-2 AP	0.084	0.131	0.241	0.178	0.023	54.281	0.129	0.042	41.978	0.103	0.53	2.761	100.481	-10.142	1133.72	-13.5089	3.36695	5300	4.9266	0.00206303	0.0126101	0.00165027	0.00409297	0.00747404	0.0211873	4.97362	3.01039	0.00711571	0.00654787	3.02432	0.0760892	0.73969	0.184221	0.326025	1.28217
Ap1	GJT-2 AP	0.025	0.089	0.132	0.076	0	54.058	0.154	0.051	42.611	0.187	0.537	2.796	100.716	-9.75	1133.72	-13.5089	3.75892	5370	4.89582	0.00249973	0.0053725	0	0.00277474	0.00408487	0.025239	4.93329	3.04922	0.00211322	0.0118623	3.06421	0.0769285	0.747457	0.175615	0.311464	1.29849	755.844	125.044	915.919	1592.98	155.311	584.914	76.5628	6.27522	55.6296	5.27051	24.8484	4.74168	10.4478
Ap1	GJT-2 AP	0.056	0.114	0.223	0.124	0	53.582	0.072	0.134	42.214	0.153	0.553	2.741	99.966	-9.75	1133.72	-13.5089	3.75892	5530	4.898	0.0066292	0.00884747	0	0.00358733	0.00696536	0.0119102	4.92931	3.049	0.00477779	0.00979612	3.06406	0.0799599	0.739592	0.180449	0.317077	1.27894	757.269	129.927	817.072	1530.99	153.811	594.068	77.5715	9.82306	55.91	5.37326	25.9625	4.82285	10.7404
Ap1	GJT-2 AP	0.019	0.121	0.194	0.06	0	53.807	0.11	0.26	42.09	0.111	0.963	2.476	100.211	-9.75	1133.72	-13.5089	3.75892	9630	4.91087	0.0128425	0.00427433	0	0.00380165	0.00605006	0.0181676	4.94316	3.03528	0.0016185	0.00709586	3.044	0.139025	0.667042	0.193933	0.341306	1.25987
Ap1	GJT-2 AP	0.002	0.107	0.272	0	0.026	54.498	0.12	0.103	42.557	0.081	1.096	1.595	100.457	-10.1931	1133.72	-13.5089	3.31582	10960	4.9205	0.00503295	0	0.00185579	0.00332567	0.00839144	0.0196063	4.95368	3.03599	0.000168538	0.00512244	3.04128	0.156526	0.425082	0.418392	0.74433	0.918914	651.406	55.4956	438.775	657.655	61.4117	246.111	31.5499	4.89503	25.9816	2.25778	10.1023	1.89124	4.94761
Ap1	GJT-2 AP	0.062	0.084	0.191	0.06	0.003	54.163	0.109	0.089	42.385	0.066	1.102	1.599	99.913	-9.80113	1133.72	-13.5089	3.70779	11020	4.91577	0.00437155	0.00425048	0.000215247	0.00262443	0.00592326	0.017902	4.94668	3.0395	0.00525194	0.00419561	3.04895	0.158204	0.428371	0.413425	0.731676	0.921953
Ap1	GJT-2 AP	0.037	0.054	0.202	0.072	0.069	54.937	0.139	0.104	41.26	0.132	0.753	2.502	100.261	-10.9259	1133.72	-13.5089	2.583	7530	4.98453	0.0051068	0.00509905	0.0049492	0.00168663	0.00626252	0.0228223	5.02534	2.95794	0.00313328	0.00838872	2.96955	0.108069	0.670084	0.221847	0.39274	1.22343
Ap1	GJT-4 AP	0	0.02	0.07	0.018	0.013	54.159	0.01	0.077	42.569	0.015	0.825	1.765	99.541	-9.97155	1133.72	-13.5089	3.53737	8250	4.92805	0.00379185	0.00127842	0.000935136	0.000626471	0.00217641	0.00164661	4.93471	3.06054	0	0.000956001	3.0615	0.118742	0.474059	0.407199	0.71881	0.929348
Ap1	GJT-4 AP	0	0.024	0.137	0	0	55.348	0.066	0.04	42.59	0.075	0.886	1.633	100.799	-9.75	1133.72	-13.5089	3.75892	8860	4.96125	0.00194046	0	0	0.000740572	0.00419612	0.0107058	4.97689	3.01646	0	0.00470883	3.02117	0.125623	0.432074	0.442302	0.792577	0.88753	735.144	56.6876	599.711	1031.26	95.8356	338.416	38.8509	6.654	26.8475	2.37212	10.5676	1.9754	4.26566
Ap1	GJT-4 AP	0	0.074	0.036	0.033	0	55.68	0.012	0.013	42.452	0.002	0.894	1.78	100.976	-9.75	1133.72	-13.5089	3.75892	8940	4.98721	0.000630171	0.00230712	0	0.00228169	0.00110179	0.00194503	4.99485	3.0044	0	0.000125473	3.00452	0.126661	0.470611	0.402728	0.722213	0.951233
Ap1	GJT-4 AP	0.038	0.084	0.299	0.042	0.039	53.341	0.05	0.13	42.933	0.137	1.292	2.094	100.479	-10.4146	1133.72	-13.5089	3.09427	12920	4.86295	0.00641415	0.00298872	0.00281081	0.00263624	0.00931427	0.00824887	4.88895	3.09265	0.00323342	0.00874828	3.10463	0.186315	0.563506	0.250178	0.44078	1.17326
Ap1	GJT-4 AP	0	0.137	0.158	0.03	0.058	54.305	0.136	0.086	43.57	0.111	1.326	2.157	102.074	-10.7385	1133.72	-13.5089	2.77047	13260	4.86648	0.0041709	0.00209843	0.00410894	0.00422632	0.00483805	0.0220546	4.9038	3.08506	0	0.00696724	3.09203	0.18796	0.570569	0.241471	0.432814	1.20745
Ap1	GJT-4 AP	0.014	0.064	0.092	0.009	0	54.932	0.009	0.019	43.332	0	0.48	1.905	100.856	-9.75	1133.72	-13.5089	3.75892	4800	4.92276	0.000921496	0.00062954	0	0.00197438	0.00281715	0.00145952	4.92964	3.06827	0.00117098	0	3.06944	0.0680412	0.50392	0.428039	0.767205	0.910451
Ap1	GJT-4 AP	0	0.03	0.222	0.042	0	54.38	0.159	0.087	43.362	0.068	0.961	1.712	101.023	-9.75	1133.72	-13.5089	3.75892	9610	4.88024	0.0042255	0.00294204	0	0.000926808	0.00680759	0.0258217	4.91673	3.07477	0	0.00427438	3.07904	0.136418	0.453512	0.41007	0.733952	0.937718	767.029	94.4922	762.789	1285.74	121.136	450.622	56.8442	6.82475	39.5518	3.90164	18.1525	3.28477	7.92472
Ap1	GJT-4 AP	0.058	0.104	0.197	0.075	0	53.823	0.12	0.132	42.524	0.062	1.488	2.012	100.595	-9.75	1133.72	-13.5089	3.75892	14880	4.89464	0.00649656	0.00532368	0	0.00325577	0.0061215	0.0197479	4.92909	3.05554	0.00492289	0.00394919	3.06441	0.214044	0.540088	0.245868	0.434271	1.18295	483.748	35.7366	295.688	474.893	43.596	163.848	19.9379	4.03201	15.1372	1.37509	6.64903	1.14825	3.16486
Ap2	SGG-2 AP	0.09	0.198	0.456	0.097	0.066	53.845	0.055	0.036	41.685	0.06	0.162	3.194	99.944	-10.8748	1133.72	-13.5089	2.63413	1620	4.9297	0.00178375	0.00693177	0.0047769	0.00624032	0.0142652	0.0091122	4.97102	3.01547	0.00769054	0.00384759	3.02719	0.0234605	0.863164	0.113376	0.19891	1.38146	1482.14	219.328	1764.73	3127.59	300.721	1085.58	136.512	11.107	90.9877	9.43821	44.4105	8.12835	19.4129
Ap2	SGG-2 AP	0.028	0.068	0.192	0.036	0	54.236	0.046	0	42.057	0.062	0.797	2.728	100.25	-9.75	1133.72	-13.5089	3.75892	7970	4.94304	0	0.00256098	0	0.00213345	0.00597924	0.00758665	4.9613	3.02863	0.00238179	0.00395787	3.0387	0.114898	0.733895	0.151207	0.266488	1.32852	288.73	173.389	458.785	1253.34	152.132	666.236	99.3294	5.93807	75.9595	7.22749	34.0604	6.41819	14.8673
Ap2	SGG-2 AP	0.055	0.186	0.349	0.018	0.02	53.381	0.12	0.009	42.398	0.068	0.231	3.183	100.018	-10.0908	1133.72	-13.5089	3.41807	2310	4.8816	0.000445425	0.00128483	0.00144588	0.00585539	0.0109054	0.0198583	4.92095	3.06353	0.00469437	0.0043556	3.0786	0.0334145	0.859202	0.107383	0.188613	1.3924	1851.99	138.644	1497.67	2644.36	227.251	769.337	86.5111	7.90987	60.4508	5.77062	25.8269	4.69355	10.6258
Ap2	SGG-2 AP	0.157	0.138	0.385	0.272	0.076	53.097	0.078	0.046	41.987	0.088	0.694	2.542	99.56	-11.0452	1133.72	-13.5089	2.46371	6940	4.87699	0.00228663	0.0195006	0.00551852	0.00436343	0.0120832	0.0129647	4.93142	3.04718	0.0134592	0.00566144	3.0663	0.10083	0.689192	0.209978	0.367201	1.22696	902.62	197.097	1281.18	2479.07	247.126	932.644	116.725	11.1832	79.5766	8.32818	39.5855	7.22948	16.9329
Ap2	SGG-2 AP	0.11	0.124	0.171	0.036	0.023	53.131	0.082	0.091	43.131	0.101	0.398	2.998	100.396	-10.142	1133.72	-13.5089	3.36695	3980	4.84346	0.00448958	0.00256158	0.00165754	0.00389132	0.00532651	0.0135272	4.87043	3.10669	0.00935923	0.006449	3.12508	0.0573903	0.80672	0.13589	0.239436	1.35218	804.568	133.159	990.47	1722.34	168.735	631.437	85.4834	6.91149	54.2572	5.59729	25.0265	4.74909	11.225
Ap2	GJT-2 AP	0.083	0.145	0.386	0.036	0	53.728	0.05	0.068	41.567	0.089	0.244	2.779	99.175	-9.75	1133.72	-13.5089	3.75892	2440	4.93488	0.00338019	0.00258093	0	0.00458469	0.0121144	0.00831058	4.96247	3.01665	0.00711529	0.0057257	3.03415	0.0354497	0.753438	0.211113	0.36919	1.22522	827.416	165.199	1063.36	2333.53	244.964	938.624	119.325	12.2413	78.2238	7.49364	33.4267	5.67266	12.5875
Ap2	GJT-2 AP	0.074	0.135	0.377	0.079	0	53.803	0.62	0.068	42.519	0.043	0.319	2.817	100.854	-9.75	1133.72	-13.5089	3.75892	3190	4.83954	0.00331027	0.00554654	0	0.00418021	0.0115872	0.100919	4.96177	3.02191	0.00621253	0.00270913	3.03492	0.0453874	0.747942	0.206671	0.369056	1.25814	908.448	291.128	1390.84	2950.89	312.155	1197.08	166.679	15.345	116.348	12.0996	56.4487	10.3482	24.439
Ap2	GJT-2 AP	0.064	0.168	0.287	0.057	0.02	53.092	0.113	0.042	43.559	0.087	0.407	2.919	100.815	-10.0908	1133.72	-13.5089	3.41807	4070	4.82233	0.00206459	0.00404111	0.0014361	0.00525296	0.00890734	0.0185734	4.86054	3.12613	0.00542559	0.0055349	3.1374	0.0584749	0.782609	0.158916	0.281029	1.32095	1210.1	213.115	1396.5	2345.09	228.485	874.279	118.832	10.4779	85.9984	8.80442	42.1266	7.63955	18.8471
Ap2	GJT-2 AP	0.033	0.137	0.394	0.048	0.036	53.846	0.07	0.008	41.997	0.069	0.496	2.817	99.951	-10.3635	1133.72	-13.5089	3.1454	4960	4.92123	0.000395701	0.0034242	0.00260106	0.00431031	0.0123043	0.0115772	4.95545	3.03277	0.00281497	0.00441705	3.04415	0.071705	0.75996	0.168335	0.295846	1.29808	961.022	229.697	1354.45	2872.87	298.844	1124.16	146.809	15.89	97.8037	10.0045	46.9161	8.39245	18.6947
Ap2	GJT-2 AP	0.161	0.131	0.267	0.07	0.043	53.724	0.086	0.058	41.463	0.075	0.536	2.812	99.426	-10.4828	1133.72	-13.5089	3.0261	5360	4.93098	0.00288104	0.00501488	0.00312004	0.00413907	0.00837365	0.014284	4.96591	3.00695	0.0137921	0.00482158	3.03121	0.0778174	0.761839	0.160343	0.280606	1.305	845.271	240.818	1221.34	2499.93	262.619	1034.55	146.405	11.9107	102.816	10.8069	50.0664	9.05082	21.1699
Ap2	GJT-2 AP	0.143	0.098	0.382	0.009	0.026	53.445	0.1	0.145	41.537	0.094	0.773	2.796	99.548	-10.1931	1133.72	-13.5089	3.31582	7730	4.91753	0.00722045	0.000646368	0.00189121	0.00310408	0.01201	0.0166504	4.95183	3.01978	0.0122805	0.00605802	3.04095	0.112504	0.759382	0.128115	0.223651	1.35174	653.122	192.607	906.599	1914.02	204.291	806.075	116.796	9.33306	79.9792	8.20831	38.4923	7.36251	16.5559
Jiaoyu
Ap1	JY-8 AP	0.073	0	0.096	0.072	0.016	53.863	0.041	0	42.381	0.003	0.255	2.961	99.761	-10.4146	1175.7	-12.7252	2.31053	2550	4.91923	0	0.0051326	0.00115519	0	0.00299583	0.00677605	4.93529	3.05829	0.00622256	0.000191907	3.06471	0.0368379	0.798231	0.164931	0.290073	1.30433	474.842	447.264	1249.65	2499.98	294.137	1233.11	201.287	23.3574	155.908	18.0785	90.4675	16.797	39.6625
Ap1	JY-8 AP	0.121	0.027	0.105	0.098	0.116	53.749	0.059	0.112	42.123	0.053	0.433	1.947	98.943	-11.7269	1175.7	-12.7252	0.998281	4330	4.90055	0.00552649	0.00697426	0.00836103	0.000847433	0.00327117	0.0262336	4.94624	3.03455	0.0102967	0.00338465	3.04823	0.0624467	0.523991	0.413562	0.728581	0.917531	479.451	501.604	958.814	1983.27	239.811	1064.97	196.565	23.6793	162.405	19.2936	98.5051	19.0759	45.604
Ap1	JY-8 AP	0.126	0	0.135	0	0.023	53.985	0.123	0	42.697	0.003	0.58	2.997	100.669	-11.7269	1175.7	-12.7252	0.998281	5800	4.9006	0	0	0.00165056	0	0.00418744	0.0202054	4.92664	3.06249	0.0106754	0.000190748	3.07336	0.0832821	0.803057	0.113661	0.201116	1.39283	406.24	487.383	614.183	1410.93	181.863	845.201	168.171	23.0786	148.568	18.2116	94.9688	17.8318	42.8467
Ap1	JY-8 AP	0.073	0.06	0.23	0.287	0.036	53.176	0.052	0	43.467	0.052	0.347	1.579	99.359	-10.7385	1175.7	-12.7252	1.98673	3470	4.78797	0	0.0201705	0.00256251	0.00185975	0.00707624	0.078536	4.89818	3.09241	0.00613477	0.00327946	3.10182	0.0494211	0.419664	0.530915	0.94711	0.743171	602.388	548.41	1209.85	2516.25	305.911	1330.93	230.886	29.0772	183.324	21.5335	108.17	20.3612	48.3189
Ap1	JY-8 AP	0.048	0.15	0.235	0.325	0.039	54.027	0.048	0.118	42.803	0.06	0.257	1.64	99.75	-10.3635	1175.7	-12.7252	2.36166	2570	4.87377	0.00576093	0.0228842	0.00278129	0.00465814	0.0072437	0.0241603	4.9355	3.05091	0.00404143	0.00379113	3.05874	0.036672	0.436698	0.52663	0.937697	0.748549	598.612	506.675	1207.92	2520.07	309.275	1334.36	231.703	26.9508	179.771	20.8899	102.618	18.8651	45.0856
Ap1	JY-8 AP	0.263	0.109	0.253	0.155	0.058	53.166	0.135	0.12	43.869	0.058	0.34	1.408	99.934	-11.9996	1175.7	-12.7252	0.725605	3400	4.79434	0.00585643	0.01091	0.00413476	0.00338367	0.00779569	0.02203	4.8426	3.12575	0.0221355	0.00366341	3.15155	0.0484977	0.374784	0.576718	1.02726	0.669588	525.051	509.58	900.869	2039.62	258.832	1136.3	211.227	26.5391	168.2	20.0422	98.7733	17.7339	45.1795
Ap1	JY-8 AP	0.202	0.1	0.265	0.125	0.161	53.442	0.069	0.056	43.877	0.059	0.35	1.779	100.485	-10.7385	1175.7	-12.7252	1.98673	3500	4.80527	0.00272509	0.0087729	0.0114443	0.0030953	0.00814179	0.022617	4.85934	3.11726	0.0169522	0.00371578	3.13793	0.0497795	0.472166	0.478055	0.853991	0.828062	586.21	403.642	1199.25	2399.42	281.557	1210.44	191.27	21.2385	150.338	16.7473	84.8987	15.9278	35.8039
Ap1	JY-8 AP	0.098	0.1	0.282	0.304	0.042	53.166	0.128	0.064	42.047	0.07	0.51	2.237	99.048	-11.352	1175.7	-12.7252	1.37321	5100	4.87375	0.00317516	0.0217521	0.00304373	0.0031557	0.00883318	0.0278692	4.9384	3.04554	0.00838483	0.00449459	3.05842	0.0739514	0.60531	0.320738	0.561995	1.05702	590.465	485.886	1281.89	2596.6	311.837	1336.7	229.125	27.646	175.58	20.0733	99.5765	18.8338	44.3218
Ap1	JY-8 AP	0.128	0.117	0.335	0.263	0.048	53.538	0.125	0.012	41.872	0.1	0.503	2.667	99.708	-10.4658	1175.7	-12.7252	2.25941	5030	4.89103	0.000593302	0.0187539	0.00346662	0.00367952	0.0104573	0.0322373	4.95962	3.02247	0.0109141	0.00639883	3.03979	0.0726864	0.719191	0.208123	0.365926	1.2365	645.792	514.782	1212.9	2493.34	307.439	1340.52	224.589	32.453	176.569	20.2739	102.911	19.3272	45.8423
Ap1	JY-9 AP	0.05	0.025	0.148	0.045	0.084	53.057	0.05	0.03	42.204	0	0.254	2.615	98.562	-11.8462	1175.7	-12.7252	0.878985	2540	4.89465	0.00149781	0.00324033	0.00612612	0.000793936	0.0046653	0.00834708	4.91782	3.07633	0.00430515	0	3.08068	0.0370646	0.712088	0.250847	0.436759	1.15842
Ap1	JY-9 AP	0.094	0.053	0.318	0.286	0.039	53.141	0.166	0.065	42.307	0.083	0.33	2.948	99.83	-12.4086	1175.7	-12.7252	0.316591	3300	4.86241	0.00321878	0.0204261	0.00282107	0.00166941	0.00994231	0.0274862	4.92475	3.05868	0.00802765	0.0053194	3.07203	0.047762	0.796218	0.15602	0.273886	1.31578	353.535	457.09	1194.39	2480.55	292.05	1222.56	202.158	21.6915	154.656	18.0515	91.268	17.1598	39.6207
Ap1	JY-9 AP	0.023	0.123	0.363	0.209	0.182	54.043	0.103	0.03	42.469	0.089	0.38	1.915	99.929	-10.7385	1175.7	-12.7252	1.98673	3800	4.89304	0.00147	0.0147701	0.0130268	0.00383364	0.0112301	0.0168757	4.95277	3.03817	0.0019436	0.00564406	3.04576	0.0544214	0.511789	0.43379	0.769576	0.892098
Ap1	JY-9 AP	0.146	0.07	0.318	0.284	0.132	53.849	0.131	0.06	42.639	0.11	0.307	1.95	99.996	-11.1815	1175.7	-12.7252	1.54363	3070	4.86377	0.00293294	0.0200222	0.00942533	0.00217651	0.00981434	0.0295842	4.93479	3.04301	0.012308	0.00695907	3.06228	0.0438612	0.519892	0.436247	0.775797	0.890363	306.496	460.124	940.543	2072.56	250.957	1088.34	187.086	20.897	152.606	17.8457	89.2078	16.7892	41.477
Ap1	JY-9 AP	0.09	0.133	0.39	0.287	0.023	53.512	0.103	0.052	43.073	0.104	0.478	1.664	99.909	-11.4713	1175.7	-12.7252	1.25391	4780	4.84611	0.0025486	0.0202872	0.00164663	0.0041463	0.0120683	0.0168797	4.90114	3.08211	0.00760718	0.00659688	3.09631	0.0684727	0.444814	0.486713	0.863261	0.808521	747.186	543.506	1102.76	2381.63	300.617	1339.52	238.746	33.8246	188.598	22.277	110.459	20.1996	47.8408
Ap1	JY-9 AP	0.105	0.087	0.395	0.251	0.094	54.806	0.16	0.032	42.195	0.098	0.507	1.373	100.103	-11.9655	1175.7	-12.7252	0.75969	5070	4.92337	0.00155576	0.0175997	0.0066756	0.00269043	0.0121247	0.02601	4.98847	2.995	0.00880366	0.00616629	3.00997	0.0720427	0.364073	0.563884	1.00825	0.692533	409.607	439.543	692.648	1520.82	192.651	862.998	166.211	20.4771	140.924	16.3791	85.2559	16.418	39.2512
Ap2	JY-8 AP	0.008	0.154	0.35	0.36	0.052	53.263	0.055	0	42.861	0.04	0.643	1.741	99.527	-10.568	1175.7	-12.7252	2.15715	6430	4.83536	0	0.0255096	0.00373193	0.00481272	0.010857	0.0418918	4.92216	3.07444	0.000677848	0.00254347	3.07784	0.0923339	0.466536	0.44113	0.780504	0.878175	664.516	480.032	1337.16	2736.7	327.221	1416.73	228.436	27.7284	181.97	19.9609	99.7532	18.4532	43.4177
Ap2	JY-8 AP	0.022	0.185	0.357	0.235	0.091	54.259	0.136	0.058	41.659	0.077	0.56	2.038	99.677	-10.4146	1175.7	-12.7252	2.31053	5600	4.93442	0.00285462	0.0166813	0.00654234	0.00579166	0.0110936	0.0223815	4.99691	2.99346	0.00186735	0.00490476	3.00024	0.0805563	0.547081	0.372363	0.657678	0.984505	642.803	503.591	1342.51	2769.94	329.223	1411.82	236.786	28.3213	180.156	20.8616	102.393	19.2515	44.6971
Ap2	JY-8 AP	0.205	0.177	0.364	0.307	0.019	53.243	0.121	0.054	42.432	0.11	0.621	1.656	99.309	-12.7154	1175.7	-12.7252	0.00983048	6210	4.85536	0.00266508	0.0218522	0.00136975	0.00555647	0.0113423	0.0199678	4.91545	3.05741	0.0174483	0.00702611	3.08188	0.0895773	0.445762	0.464661	0.818443	0.83742	580.969	536.678	1504.95	3018.53	353.388	1502.2	250.952	29.8012	191.437	21.987	108.319	20.0491	46.705
Ap2	JY-8 AP	0.066	0.184	0.425	0.101	0	54.128	0.391	0.006	41.49	0.149	0.652	2.118	99.71	-10.142	1175.7	-12.7252	2.58321	6520	4.91622	0.000294929	0.00716025	0	0.00575299	0.0131898	0.0642646	5.00659	2.97751	0.0055949	0.00947891	2.99312	0.0936708	0.56783	0.338499	0.598631	1.03895	699.692	598.928	1282.62	2676.85	329.198	1446.73	249.24	32.0276	195.245	23.4161	115.863	21.7997	51.4607
Ap2	JY-8 AP	0.036	0.187	0.427	0.203	0.084	54.438	0.078	0.054	41.832	0.009	0.76	1.882	99.99	-10.0738	1175.7	-12.7252	2.65138	7600	4.94125	0.00265268	0.0143823	0.00602756	0.0058431	0.0132435	0.012812	4.99356	3.00016	0.00304984	0.00057219	3.00378	0.109118	0.504241	0.386641	0.684202	0.963946
Ap2	JY-8 AP	0.05	0.24	0.436	0.324	0.104	54.096	0.344	0	41.422	0.154	0.66	2.28	100.11	-10.7896	1175.7	-12.7252	1.93561	6600	4.90724	0	0.0229411	0.00745818	0.00749463	0.0135144	0.0564698	5.01512	2.96896	0.00423332	0.00978489	2.98488	0.0947029	0.610507	0.294791	0.521978	1.10897	452.838	494.538	1447.18	2911.04	335.832	1404.59	228.231	25.8734	174.288	20.443	99.7269	18.9433	45.1988
Ap2	JY-8 AP	0.051	0.24	0.489	0.36	0.13	53.9	0.163	0.008	42.41	0.02	0.613	1.843	100.227	-12.4938	1175.7	-12.7252	0.23138	6130	4.87761	0.0003918	0.0254284	0.00930013	0.00747647	0.0151205	0.0266926	4.96163	3.03241	0.00430752	0.00126768	3.03798	0.0877457	0.492296	0.419958	0.745416	0.914355	480.463	486.623	1496.97	2954.24	337.424	1411.06	231.704	25.6144	171.615	20.3418	100.686	18.4258	42.9389
Ap2	JY-9 AP	0.035	0.101	0.295	0.161	0.103	54.054	0.085	0.012	42.007	0.072	0.574	1.818	99.317	-11.5224	1175.7	-12.7252	1.20279	5740	4.92344	0.000591533	0.0114463	0.00741661	0.00316686	0.00918125	0.0140102	4.96866	3.02318	0.00297542	0.00459342	3.03075	0.082699	0.488785	0.428516	0.755679	0.895028	653.234	631.341	1293.04	2754.42	345.003	1509.66	267.431	30.4241	206.183	24.7551	123.294	22.8984	56.2643
Ap2	JY-9 AP	0.022	0.197	0.348	0.248	0.058	53.3	0.192	0.072	43.01	0.096	0.446	1.735	99.724	-11.3008	1175.7	-12.7252	1.42434	4460	4.83534	0.003535	0.017561	0.00415964	0.00615224	0.0107874	0.0315201	4.90552	3.08298	0.00186278	0.00610006	3.09094	0.0640003	0.464604	0.471396	0.834636	0.831197	525.036	557.873	1376.54	2797.39	338.887	1465.87	246.276	28.1369	194.092	22.4133	112.413	21.0707	49.0547
Ap2	JY-9 AP	0.12	0.185	0.274	0.149	0.101	54.56	0.092	0.015	41.985	0.013	0.513	2.051	100.058	-12.3404	1175.7	-12.7252	0.38476	5130	4.93807	0.000734735	0.0105261	0.00722656	0.00576397	0.00847369	0.015068	4.98513	3.00247	0.0101369	0.000824118	3.01413	0.0734425	0.547939	0.378619	0.67194	0.979374	437.05	381.384	1517.62	2905.27	322.1	1293.22	191.221	22.3063	142.942	16.1947	79.1295	14.6836	34.7873
Ap2	JY-9 AP	0.032	0.187	0.506	0.266	0.058	53.318	0.133	0.089	42.256	0.043	0.624	2.016	99.528	-12.0166	1175.7	-12.7252	0.708563	6240	4.87226	0.00440152	0.018973	0.00418998	0.00588254	0.0157996	0.0219935	4.93909	3.05102	0.00272926	0.00275225	3.0565	0.0901962	0.543788	0.366015	0.643361	0.989683	470.216	442.013	1576.28	3065.37	350.906	1432.76	226.006	24.1791	169.465	18.1905	89.1028	16.7505	39.8651
Ap2	JY-9 AP	0.236	0.267	0.525	0.212	0.096	53.548	0.144	0.061	42.686	0.127	0.657	1.357	99.916	-9.75	1175.7	-12.7252	2.97518	6570	4.84646	0.00298791	0.0149766	0.00686878	0.00831877	0.016236	0.0235846	4.91644	3.05258	0.0199357	0.00805096	3.08057	0.0940576	0.36253	0.543412	0.964405	0.719642	446.228	497.754	1536.45	3040.18	350.842	1447.14	230.596	24.0465	174.608	20.3435	100.373	18.7115	44.4491
Ap2	JY-9 AP	0.43	0.276	0.561	0.248	0.061	54.334	0.125	0.042	41.54	0.123	0.644	1.759	100.143	-10.0227	1175.7	-12.7252	2.70251	6440	4.91593	0.00205655	0.0175139	0.00436306	0.00859627	0.0173435	0.0204658	4.98421	2.96962	0.0363113	0.00779475	3.01373	0.0921652	0.469768	0.438067	0.77771	0.88598
Ap2	JY-9 AP	0.041	0.168	0.416	0.209	0.116	53.769	0.13	0.01	41.8	0.042	0.695	1.699	99.095	-12.5108	1175.7	-12.7252	0.214338	6950	4.91264	0.00049447	0.0149048	0.00837854	0.00528395	0.0129872	0.0214937	4.97569	3.01759	0.00349628	0.00268779	3.02382	0.100442	0.458205	0.441353	0.775916	0.872223	446.497	492.2	1363.85	2738.78	326.548	1383.62	228.409	21.7199	175.935	19.9959	100.718	18.6586	43.1434
Ap2	JY-9 AP	0.039	0.176	0.419	0.149	0.062	54.063	0.237	0	41.974	0.119	0.423	1.958	99.619	-10.142	1175.7	-12.7252	2.58321	4230	4.90669	0	0.0105553	0.00444844	0.0054988	0.0129939	0.0389244	4.97911	3.01002	0.00330364	0.00756481	3.02089	0.0607262	0.524547	0.414727	0.733982	0.919906	497.735	547.49	1302.4	2729.03	331.905	1442.19	247.243	25.1488	195.609	22.0447	113.613	20.0874	47.7841
Ap2	JY-9 AP	0.165	0.11	0.459	0.146	0.174	53.148	0.237	0.109	42.526	0.104	0.581	1.613	99.372	-11.1815	1175.7	-12.7252	1.54363	5810	4.83657	0.00536826	0.0103705	0.0125178	0.00344596	0.0142726	0.0390288	4.91621	3.05778	0.0140144	0.00662899	3.07842	0.0836323	0.43328	0.483088	0.852681	0.810288	702.75	553.563	1221.89	2614.37	324.797	1410.24	248.607	31.9183	186.745	22.5671	111.573	20.5586	48.7384
Ap2	JY-9 AP	0.124	0.165	0.465	0.241	0.123	53.892	0.261	0.038	41.43	0.044	0.59	2.164	99.537	-12.8517	1175.7	-12.7252	-0.126508	5900	4.91224	0.00187454	0.0171463	0.00886314	0.00517733	0.0144826	0.0430508	5.00096	2.98381	0.0105491	0.00280912	2.99717	0.0850657	0.582231	0.332703	0.58629	1.04433
Jinniushan
Ap1	TS-8 AP	0.075	0	0.053	0.015	0.103	53.772	0.025	0.021	41.609	0.023	1.054	2.245	98.995	-10.5851	1115.04	-13.8763	3.29122	10540	4.95009	0.00104624	0.00107782	0.00749586	0	0.00166714	0.00416469	4.9645	3.02653	0.00644403	0.00148302	3.03446	0.153478	0.610037	0.236485	0.412627	1.18313	358.252	86.7378	310.598	649.618	72.5682	305.497	41.9936	6.50831	33.9578	3.66767	18.2033	3.22629	7.94884
Ap1	TS-8 AP	0.083	0	0.055	0.06	0.016	54.417	0.036	0.056	42.484	0.059	1.078	2.199	100.543	-13.0221	1115.04	-13.8763	0.854174	10780	4.93144	0.00274653	0.00424413	0.00114627	0	0.0017031	0.00590375	4.94444	3.04205	0.00702032	0.00374502	3.05281	0.154527	0.588231	0.257241	0.455945	1.16918
Ap1	TS-8 AP	0.12	0	0.064	0.015	0	54.021	0.028	0.08	42.227	0.1	1.013	2.177	99.845	-11.7951	1115.04	-13.8763	2.08122	10130	4.92805	0.00394965	0.00106807	0	0	0.00199495	0.00462228	4.93573	3.04371	0.0102172	0.00638962	3.06032	0.146174	0.586211	0.267615	0.471205	1.14525	477.498	137.698	615.223	1279.94	135.985	528.014	76.4879	17.7237	56.3097	5.83558	28.4035	5.16984	12.0459
Ap1	TS-8 AP	0.032	0	0.075	0.036	0	54.855	0.002	0.068	42.871	0.077	1.119	1.592	100.727	-11.4031	1115.04	-13.8763	2.47319	11190	4.93596	0.00331147	0.00252845	0	0	0.00230598	0.000325665	4.94112	3.04803	0.00268747	0.00485298	3.05557	0.159269	0.422845	0.417885	0.745957	0.922841	1123.51	215.739	467.431	1027	125.212	558.424	98.9225	19.5657	76.2141	8.80075	43.543	8.26069	18.3545
Ap1	TS-8 AP	0.174	0.027	0.15	0.03	0.055	53.745	0.084	0.062	43.252	0.013	1.113	1.498	100.203	-11.6928	1115.04	-13.8763	2.18347	11130	4.86356	0.00303644	0.00211902	0.00393465	0.000841098	0.00463816	0.0137556	4.88885	3.0926	0.0146962	0.000823991	3.10812	0.159316	0.400139	0.440545	0.781962	0.881906	915.416	173.652	840.251	1464.05	154.148	594.344	83.3583	13.7833	63.5113	7.19163	35.4282	6.18596	15.3608
Ap1	TS-8 AP	0.002	0	0.177	0.033	0.023	53.567	0.066	0.088	42.58	0.055	0.879	2.114	99.584	-12.187	1115.04	-13.8763	1.68924	8790	4.89628	0.0043532	0.0023544	0.00166197	0	0.00552816	0.0109169	4.91674	3.07521	0.000170623	0.00352123	3.07891	0.127088	0.57037	0.302541	0.531652	1.08849
Ap1	TS-8 AP	0.034	0.137	0.114	0.036	0.039	54.265	0.101	0.002	42.875	0.102	1.025	2.028	100.758	-11.352	1115.04	-13.8763	2.52431	10250	4.90121	9.7762e-05	0.00253795	0.00278468	0.00425962	0.00351825	0.0165078	4.93082	3.05977	0.00286617	0.00645277	3.06909	0.146438	0.540673	0.312889	0.55644	1.08522	699.025	171.016	489.169	1021.13	119.025	500.173	80.2152	13.1172	64.0224	7.33108	35.5688	6.71277	16.5497
Ap1	TS-8 AP	0.017	0.017	0.318	0.021	0.1	53.373	0.042	0.027	42.559	0.032	1.213	2.267	99.986	-13.3459	1115.04	-13.8763	0.530371	12130	4.8888	0.00133845	0.0015014	0.00724116	0.000536039	0.00995283	0.00696171	4.915	3.08016	0.00145335	0.00205302	3.08367	0.175747	0.612937	0.211316	0.370563	1.22828	1038.51	179.676	459.612	973.135	116.607	500.718	83.4195	16.0156	65.4431	7.34433	36.3959	6.9057	16.8453
Ap1	TS-8 AP	0.088	0.084	0.282	0.572	0.156	53.495	0.219	0.093	42.172	0.132	1.017	1.353	99.663	-12.4086	1115.04	-13.8763	1.4677	10170	4.85521	0.00456808	0.0405217	0.011193	0.00262446	0.00874545	0.0359687	4.95426	3.02426	0.00745446	0.00839134	3.04117	0.146003	0.362473	0.491524	0.869884	0.799189	662.595	140.24	509.142	1021.49	117.584	482.426	70.7526	12.3809	52.3408	5.47259	28.4238	5.5121	13.0784
Ap1	TS-8 AP	0.061	0.103	0.237	0.444	0.114	53.941	0.061	0.09	42.62	0.113	1.082	1.55	100.416	-12.6301	1115.04	-13.8763	1.24615	10820	4.87796	0.00440472	0.0313401	0.00814989	0.00320644	0.00732329	0.0099824	4.93796	3.04533	0.00514859	0.00715749	3.05763	0.154773	0.413746	0.431481	0.766397	0.896807	849.32	158.451	686.497	1270.49	138.457	540.736	77.666	15.8159	57.099	6.32954	32.3779	6.12966	14.454
Ap1	TS-15 AP	0.003	0.037	0	0.027	0.036	53.858	0.005	0.094	42.481	0.087	0.872	1.662	99.162	-11.9996	1115.04	-13.8763	1.87671	8720	4.918	0.0046454	0.00192442	0.00259877	0.00116307	0	0.000826216	4.92451	3.06502	0.000255681	0.00556443	3.07084	0.125951	0.447974	0.426075	0.749479	0.896582	1227.81	222.872	693.631	1415.81	163.308	682.781	106.434	20.8409	78.0211	8.62484	43.3861	8.13154	19.0716
Ap1	TS-15 AP	0	0.033	0.114	0.107	0.049	54.766	0.042	0.018	42.252	0.032	0.809	1.634	99.856	-10.4146	1115.04	-13.8763	3.46164	8090	4.95443	0.000881277	0.00755552	0.00350434	0.00102769	0.00352393	0.00687572	4.97692	3.02017	0	0.00202766	3.0222	0.115765	0.436333	0.447901	0.795262	0.870577	937.238	185.989	766.531	1384.12	149.401	583.153	87.4179	17.2656	64.3888	7.43857	37.4956	6.99991	17.1961
Ap1	TS-15 AP	0	0.041	0.136	0.033	0.12	53.84	0.298	0.031	42.486	0.112	0.93	1.919	99.946	-11.0111	1115.04	-13.8763	2.86516	9300	4.88204	0.0015213	0.00233565	0.00860212	0.00127982	0.0042138	0.0488988	4.94737	3.04399	0	0.00711341	3.0511	0.133391	0.513635	0.352974	0.625255	1.01789	1018.48	191.051	442.883	960.884	118.326	508.099	85.8105	17.5816	65.971	7.79667	39.2809	7.1197	17.1791
Ap1	TS-15 AP	0.011	0.04	0.139	0.075	0	53.457	0.094	0.065	42.219	0.079	1.153	2.232	99.564	-11.778	1115.04	-13.8763	2.09826	11530	4.90395	0.0032271	0.00537033	0	0.00126319	0.00435708	0.0156047	4.93055	3.06021	0.000941833	0.00507612	3.06622	0.167309	0.604393	0.228299	0.399736	1.2
Ap1	TS-15 AP	0.076	0.112	0.189	0.477	0.192	53.89	0.094	0.074	42.037	0.051	1	1.709	99.901	-10.0227	1115.04	-13.8763	3.85361	10000	4.89637	0.00363877	0.0338284	0.013791	0.00350309	0.00586768	0.0154554	4.96881	3.01786	0.00644494	0.00324563	3.02755	0.143719	0.458344	0.397938	0.703494	0.945255
Ap1	TS-15 AP	0.091	0.094	0.275	0.456	0.094	53.9	0.16	0.119	41.459	0.142	1.173	1.542	99.505	-11.5735	1115.04	-13.8763	2.30277	11730	4.91379	0.00587126	0.0324482	0.00677459	0.00295	0.00856641	0.0263957	4.99092	2.9864	0.00774298	0.00906732	3.00321	0.16915	0.414949	0.4159	0.732779	0.913972	1101.91	209.42	411.668	878.53	109.694	493.637	91.1199	18.5803	74.4875	8.87643	42.0801	7.77294	18.0746
Ap1	TS-15 AP	0.094	0.089	0.255	0.602	0.211	54.376	0.249	0.113	41.97	0.158	1.066	1.467	100.65	-10.3635	1115.04	-13.8763	3.51277	10660	4.88703	0.00549633	0.042231	0.0149916	0.00275356	0.00783099	0.040497	4.99533	2.98042	0.00788505	0.00994621	2.99917	0.151545	0.38918	0.459275	0.820817	0.858248
Ap1	TS-15 AP	0.105	0.15	0.257	0.063	0.11	53.618	0.156	0.04	42.98	0.105	1.184	1.718	100.486	-10.6873	1115.04	-13.8763	3.18896	11840	4.8562	0.00196066	0.00445374	0.00787601	0.00467675	0.0079535	0.025568	4.90673	3.07577	0.00887595	0.00666099	3.09131	0.169623	0.459296	0.371081	0.658102	0.990563
Ap2	TS-8 AP	0.064	0.149	0.205	0.325	0.109	53.518	0.173	0.029	42.2	0.179	1.895	1.278	100.124	-11.8462	1115.04	-13.8763	2.03009	18950	4.87415	0.0014294	0.0231036	0.0078479	0.00467146	0.00637958	0.0285122	4.94467	3.03678	0.00544025	0.0114187	3.0539	0.272996	0.343569	0.383436	0.676246	0.965723	1277.89	366.906	827.894	1775	220.022	979.115	167.972	22.7828	140.718	16.1229	81.9703	14.8025	34.1346
Ap2	TS-8 AP	0.017	0.183	0.406	0.179	0.029	52.994	0.031	0.073	43.063	0	1.636	1.665	100.276	-13.5163	1115.04	-13.8763	0.359949	16360	4.84542	0.0036123	0.0127748	0.00209619	0.00576	0.0126844	0.00512923	4.88387	3.11107	0.00145075	0	3.11252	0.236611	0.449368	0.314021	0.551651	1.07024	1005.83	1109.73	1515.89	3697.06	490.92	2271.87	419.742	64.0561	383.207	47.4285	247.009	48.0111	114.8
Ap2	TS-8 AP	0.073	0.085	0.268	0.571	0.097	53.067	0.132	0.183	42.629	0.191	1.152	1.509	99.957	-12.4597	1115.04	-13.8763	1.41657	11520	4.82797	0.00901047	0.0405484	0.00697652	0.00266211	0.00833131	0.021732	4.90822	3.0644	0.00619872	0.0121713	3.08277	0.165783	0.40524	0.428977	0.757366	0.895338	868.143	404.058	1250.71	2405.52	267.352	1088	180.25	30.7161	150.273	17.2886	87.0146	16.8605	39.882
Ap2	TS-8 AP	0.076	0.284	0.463	0.384	0.093	53.297	0.284	0.047	42.936	0.276	1.7	0.831	100.671	-11.9655	1115.04	-13.8763	1.91079	17000	4.80869	0.00229498	0.0270429	0.00663338	0.00882083	0.0142739	0.0463691	4.91183	3.06088	0.00639996	0.017442	3.08587	0.242617	0.221314	0.53607	0.954351	0.733503	393.637	149.646	1268.2	1970.98	178.785	601.394	74.9722	16.575	51.1325	5.6021	28.4174	5.37344	12.8393
Ap2	TS-8 AP	0.004	0.276	0.403	0.325	0.072	52.532	0.08	0.061	42.588	0	1.851	1.227	99.419	-14.0106	1115.04	-13.8763	-0.134277	18510	4.82618	0.00303295	0.0233056	0.00522925	0.015054	0.0220685	0.0133001	4.90514	3.09149	0.000342988	0	3.09183	0.268988	0.332742	0.39827	0.696321	0.93432	1172.14	321.042	1124	2211.17	248.166	1015	155.034	28.9257	114.053	12.6122	61.9432	11.5776	28.1471
Ap2	TS-8 AP	0.013	0.202	0.233	0.503	0.101	53.221	0.204	0.038	42.205	0.207	1.8	1.191	99.918	-9.75	1115.04	-13.8763	4.12629	18000	4.8521	0.00187494	0.0357942	0.00727939	0.00633964	0.0072584	0.033656	4.94242	3.04026	0.00110619	0.0132184	3.0557	0.259577	0.32051	0.419913	0.739817	0.907653	1108.27	649.24	1236.16	2681.15	329.826	1441.36	268.885	43.4129	241.74	28.5557	145.986	28.2418	65.2452
Ap2	TS-8 AP	0.094	0.16	0.261	0.092	0.045	52.959	0.218	0.107	42	0.153	1.979	1.515	99.583	-10.2442	1115.04	-13.8763	3.63206	19790	4.86735	0.00532223	0.00659992	0.00326959	0.00506221	0.00819658	0.0362573	4.92674	3.05003	0.00806344	0.00984935	3.06794	0.287704	0.411007	0.301289	0.526552	1.08447	1245.44	267.138	926.027	1824.77	211.377	877.59	133.68	24.1653	97.0397	10.7269	53.526	10.2032	24.131
Ap2	TS-15 AP	0.109	0.111	0.266	0.083	0.103	54.689	0.117	0.043	41.982	0.104	0.808	1.259	99.674	-9.75	1115.04	-13.8763	4.12629	8080	4.94111	0.00210257	0.00585329	0.0073568	0.00345235	0.00821192	0.0191292	4.98511	2.99701	0.00919158	0.00658144	3.01279	0.115474	0.335763	0.548763	0.975599	0.712449	1150.41	317.737	1526.1	2750.34	292.94	1134.39	160.564	29.9726	118.648	12.6863	62.4391	11.8741	28.7287
Ap2	TS-15 AP	0.077	0.257	0.239	0.087	0.079	53.14	0.167	0.049	43.367	0.064	0.948	1.614	100.088	-9.75	1115.04	-13.8763	4.12629	9480	4.8226	0.00240665	0.00616278	0.00566779	0.00802896	0.00741133	0.0274259	4.87729	3.10971	0.00652213	0.0040682	3.1203	0.136086	0.432361	0.431553	0.763811	0.89352
Ap2	TS-15 AP	0.019	0.11	0.27	0.429	0.053	53.595	0.116	0.137	42.026	0.113	1.392	1.36	99.62	-12.1189	1115.04	-13.8763	1.75741	13920	4.88923	0.00676384	0.0305472	0.00382225	0.00345442	0.00841624	0.0191496	4.95462	3.02925	0.00161774	0.00722033	3.03862	0.200864	0.366217	0.432919	0.762259	0.886753
Ap2	TS-15 AP	0.011	0.157	0.293	0.176	0.119	54.3	0.1	0.11	41.146	0.104	1.316	1.231	99.063	-11.4542	1115.04	-13.8763	2.42206	13160	4.96313	0.00544133	0.0125564	0.00859864	0.00493995	0.00915086	0.0165402	5.01491	2.97156	0.000938399	0.00665812	2.97965	0.190265	0.332121	0.477614	0.839329	0.815285	530.835	170.732	1461.8	2438.71	228.658	780.578	96.5004	18.7901	64.8545	7.17124	34.2799	6.46651	15.9271
Ap2	TS-15 AP	0.079	0.23	0.376	0.313	0.119	52.534	0.033	0.105	42.684	0.036	1.009	1.545	99.063	-11.5054	1115.04	-13.8763	2.37093	10090	4.82951	0.00522407	0.0224597	0.00864843	0.00727876	0.0118111	0.00548987	4.8852	3.10048	0.00677843	0.00231808	3.10958	0.146724	0.419251	0.434025	0.758338	0.87823	1186.06	306.775	906.009	1935.46	233.383	990.362	152.585	27.7823	118.604	12.8578	62.3231	11.7247	28.3526
Ap2	TS-15 AP	0.121	0.17	0.407	0.188	0.107	53.788	0.091	0.039	42.087	0.002	2.385	1.452	100.837	-11.6246	1115.04	-13.8763	2.25164	23850	4.90255	0.00192379	0.013375	0.00770989	0.005334	0.0126756	0.0150094	4.95666	3.031	0.0102935	0.000127682	3.04142	0.343853	0.390649	0.265498	0.467882	1.14955	1163.09	705.35	1437.47	3093.27	382.903	1732.75	314.009	36.8977	279.93	32.4794	160.548	29.083	67.4415
Ap2	TS-15 AP	0.03	0.181	0.425	0.211	0.12	53.197	0.071	0.029	42.755	0.259	1.439	1.435	100.152	-10.5169	1115.04	-13.8763	3.35939	14390	4.84711	0.00143005	0.0150064	0.0086438	0.0056773	0.0132319	0.0117069	4.90138	3.07811	0.00255127	0.0165295	3.09719	0.207398	0.38595	0.406652	0.716866	0.928938	900.958	464.441	722.343	1718.54	223.611	1029.49	190.724	24.9987	155.673	17.991	90.6259	17.1116	42.1282
Ap2	TS-15 AP	0.071	0.106	0.466	0.101	0.103	53.639	0.095	0.05	43.439	0.051	0.942	1.654	100.717	-11.5054	1115.04	-13.8763	2.37093	9420	4.84223	0.00244282	0.00711679	0.00735072	0.00329411	0.0143744	0.0155194	4.88989	3.09846	0.00598223	0.00322477	3.10767	0.134513	0.440741	0.424746	0.755745	0.909009
Ap2	TS-15 AP	0.008	0.286	0.467	0.337	0.074	52.146	0.142	0.085	43.152	0.013	1.679	1.128	99.517	-10.142	1115.04	-13.8763	3.73431	16790	4.77601	0.00421328	0.024092	0.00535801	0.0153231	0.0271333	0.0235352	4.87145	3.12282	0.00068387	0.000833971	3.12433	0.243244	0.304956	0.4518	0.792343	0.853823	751.165	220.289	1572.58	2604	254.111	901.025	115.919	20.4173	79.0158	8.64957	42.1042	8.17431	20.0939
Ap1	TTG-41 AP	0	0	0	0.161	0.081	55.063	0.057	0.108	42.844	0.061	0.168	1.951	100.494	-10.3124	1138.59	-13.415	3.10257	1680	4.93233	0.00523567	0.0112568	0.00573594	0	0	0.00923959	4.95856	3.03238	0	0.00382723	3.0362	0.0238039	0.515861	0.460335	0.825455	0.85942	792.038	256.143	1172.15	2242.02	244.439	944.692	149.38	27.3928	102.375	11.0515	52.9438	9.30354	21.7487
Ap1	TTG-41 AP	0	0	0.018	0.163	0.03	54.208	0.072	0.029	42.314	0.051	0.185	2.362	99.432	-10.0397	1138.59	-13.415	3.37524	1850	4.92909	0.00142711	0.0115688	0.00215651	0	0.000559261	0.0118474	4.95522	3.0401	0	0.00324815	3.04335	0.0266086	0.633967	0.339425	0.599586	1.03632	1866.9	313.449	1051.14	2191.09	259.888	1073.92	167.325	30.5109	121.974	13.0364	65.4949	12.1615	28.1364
Ap1	TTG-41 AP	0.012	0	0.043	0.076	0.033	54.711	0.055	0.069	42.628	0.023	0.365	2.375	100.39	-11.1304	1138.59	-13.415	2.28454	3650	4.93686	0.00336963	0.00535288	0.00235406	0	0.00132582	0.008981	4.95488	3.03929	0.00101064	0.00145367	3.04175	0.0520974	0.632591	0.315311	0.561274	1.08241	963.55	180.634	864.282	1669.67	176.495	659.259	96.5043	23.1899	65.1997	7.28538	36.8267	6.27015	15.5912
Ap1	TTG-41 AP	0.017	0	0.045	0.133	0.017	54.848	0.121	0.048	42.928	0.011	0.128	1.857	100.153	-10.4317	1138.59	-13.415	2.98327	1280	4.92087	0.00233066	0.00931387	0.00120575	0	0.00137953	0.019645	4.95241	3.04314	0.00142354	0.000691252	3.04526	0.0181651	0.491786	0.490049	0.877344	0.810813
Ap1	TTG-41 AP	0.045	0.04	0.05	0.107	0.087	54.31	0.117	0.261	43.842	0.084	0.157	1.916	101.016	-11.6758	1138.59	-13.415	1.73918	1570	4.84975	0.0126135	0.00745798	0.00614167	0.00122961	0.00152563	0.0189065	4.88502	3.09337	0.00375052	0.00525391	3.10237	0.0221762	0.505032	0.472792	0.850436	0.8422
Ap1	TTG-41 AP	0.075	0.05	0.052	0.075	0.103	53.958	0.073	0.033	43.225	0.064	0.18	2.371	100.259	-10.2613	1138.59	-13.415	3.15369	1800	4.87473	0.00161349	0.00528876	0.00735631	0.00155501	0.00160523	0.0119345	4.90247	3.08554	0.00632405	0.00404984	3.09591	0.0257226	0.632281	0.341997	0.608049	1.03898
Ap1	TTG-41 AP	0.006	0.017	0.058	0.064	0.04	54.32	0.005	0.056	42.792	0.003	0.493	2.642	100.496	-11.9485	1138.59	-13.415	1.46651	4930	4.9222	0.00274628	0.00452665	0.00286541	0.000530292	0.00179583	0.000819889	4.93274	3.06382	0.000507446	0.000190407	3.06452	0.0706633	0.706668	0.222669	0.394703	1.22371	956.237	177.523	838.11	1668.35	186.731	742.326	122.989	23.099	82.3058	8.24968	37.5336	6.31195	14.7978
Ap1	TTG-43 AP	0.005	0.007	0.072	0.2	0.113	54.288	0.215	0.092	42.256	0.058	0.171	3.187	100.664	-11.0963	1138.59	-13.415	2.31862	1710	4.91113	0.00450425	0.0141223	0.00808135	0.000217993	0.00222561	0.0351967	4.97098	3.02042	0.00042217	0.0036751	3.02452	0.0244693	0.851027	0.124504	0.221063	1.38054	1129.72	137.192	714.766	1245.41	123.538	455.614	66.4761	21.805	47.23	5.44221	26.4448	5.07648	12.2382
Ap1	TTG-43 AP	0.025	0	0.077	0.191	0.09	54.383	0.159	0.116	42.899	0.095	0.258	1.509	99.802	-10.6021	1138.59	-13.415	2.81285	2580	4.89023	0.00564522	0.0134059	0.00639788	0	0.0023659	0.0258731	4.93828	3.048	0.00209819	0.00598347	3.05608	0.0366972	0.400534	0.562769	1.00525	0.693614	931.585	200.792	1074.4	2077.11	228.847	889.077	136.965	22.4966	86.3121	9.33402	42.8174	7.24718	15.8366
Ap1	TTG-43 AP	0.044	0.04	0.093	0.157	0.079	54.608	0.116	0.132	42.642	0.1	0.211	1.672	99.894	-11.2838	1138.59	-13.415	2.13116	2110	4.91278	0.00642691	0.0110247	0.00561857	0.00123879	0.00285886	0.0188849	4.95241	3.03117	0.00369457	0.00630136	3.04116	0.0300263	0.444008	0.525966	0.939068	0.751643	983.437	213.363	1133.99	2190.25	243.017	939.002	137.497	24.5496	96.3833	9.71908	45.3686	7.61159	17.9346
Ap1	TTG-43 AP	0.12	0.012	0.154	0.1	0.129	54.308	0.074	0.12	42.85	0.106	0.477	1.711	100.161	-11.8973	1138.59	-13.415	1.51764	4770	4.89332	0.00585164	0.00703295	0.00918876	0.00037221	0.00474132	0.0120658	4.92672	3.05065	0.0100916	0.00668973	3.06743	0.0679838	0.455065	0.476952	0.850248	0.828086	2125.41	229.567	601.435	1280.64	151.712	648.445	112.394	26.5731	85.3102	9.17886	47.1617	8.89565	21.0983
Ap1	TTG-43 AP	0.093	0.08	0.149	0.128	0.09	53.705	0.123	0.144	42.216	0.11	0.465	1.868	99.171	-11.2327	1138.59	-13.415	2.18228	4650	4.89478	0.00710293	0.00910596	0.00648467	0.00251001	0.00464027	0.0202866	4.9378	3.04016	0.00791116	0.00702221	3.05509	0.0670376	0.502549	0.430414	0.758541	0.891487	2268.82	318.662	810.685	1752.38	207.082	866.746	151.179	36.2149	116.411	13.1197	66.1873	11.9844	29.6452
Ap2	TTG-41 AP	0.05	0	0.147	0.072	0.055	53.943	0.051	0.139	42.42	0.135	0.55	2.488	100.05	-10.0738	1138.59	-13.415	3.34116	5500	4.90842	0.00684507	0.00511372	0.00395637	0	0.00457049	0.00839774	4.93046	3.04985	0.00424635	0.00860406	3.0627	0.0791619	0.668252	0.252586	0.445876	1.17173
Ap2	TTG-41 AP	0.059	0.058	0.102	0.151	0.04	53.763	0.115	0.096	42.823	0.121	0.581	1.611	99.52	-10.3465	1138.59	-13.415	3.06848	5810	4.87618	0.00471221	0.0106898	0.00286803	0.00181089	0.00316108	0.0188747	4.91359	3.06884	0.00499445	0.00768679	3.0817	0.0833527	0.431296	0.485351	0.85955	0.809446	1068.39	312.341	1453.22	2908.06	322.006	1243.11	190.103	33.7615	129.705	13.8312	63.9631	11.0768	25.1181
Ap2	TTG-41 AP	0.113	0.05	0.141	0.354	0.026	54.208	0.062	0.088	41.891	0.025	0.697	2.23	99.885	-11.6246	1138.59	-13.415	1.79031	6970	4.93066	0.00433192	0.0251329	0.00186957	0.00156559	0.00438227	0.0102051	4.97381	3.01067	0.0095931	0.00159274	3.02186	0.100282	0.598728	0.30099	0.531524	1.09626	219.483	1553.1	1810.08	4570.58	578.875	2483.3	483.251	24.1803	417.222	52.2344	284.248	53.2134	132.674
Ap2	TTG-41 AP	0.056	0.073	0.155	0.095	0.113	54.12	0.073	0.078	42.585	0.105	0.641	2.045	100.139	-11.2838	1138.59	-13.415	2.13116	6410	4.90275	0.00382414	0.00671743	0.0080926	0.00227652	0.00479792	0.0119671	4.9366	3.04817	0.00473489	0.00666246	3.05957	0.0918518	0.546838	0.36131	0.640633	1.00573	911.312	319.822	1558.78	3042.78	340.924	1332.96	213.316	32.5929	139.892	14.4997	66.4062	11.4632	26.2404
Ap2	TTG-41 AP	0.143	0.153	0.196	0.134	0.126	53.18	0.077	0.176	42.96	0.066	0.275	1.761	99.247	-11.5054	1138.59	-13.415	1.90961	2750	4.84212	0.00867275	0.00952335	0.00906954	0.00479563	0.00609793	0.0126871	4.8843	3.09067	0.0121524	0.00420915	3.10703	0.0396066	0.473293	0.487101	0.859295	0.80356	759.19	463.647	1663.2	3467.03	397.399	1589.81	261.786	40.045	182.017	20.7175	96.2308	16.6873	40.6028
Ap2	TTG-41 AP	0.167	0.049	0.201	0.226	0.09	53.543	0.072	0.152	42.585	0.156	0.56	1.685	99.486	-11.6246	1138.59	-13.415	1.79031	5600	4.86745	0.00747824	0.0160363	0.00646799	0.00153342	0.00624358	0.0118445	4.90958	3.05884	0.0141695	0.00993314	3.08294	0.0805257	0.45215	0.467325	0.825716	0.835867	1069.12	331.543	1607.46	3150.97	352.295	1361.1	209.553	37.6393	139.692	14.528	68.2998	11.9151	27.2996
Ap2	TTG-41 AP	0.005	0.141	0.234	0.128	0.019	53.852	0.045	0.245	42.454	0.025	0.368	2.124	99.64	-10.6873	1138.59	-13.415	2.72764	3680	4.90254	0.012071	0.00909552	0.00136742	0.00441881	0.00727904	0.00741341	4.93212	3.05379	0.000424844	0.00159413	3.05581	0.0529926	0.570765	0.376242	0.663833	0.977394	1085.88	286.706	1480.29	2915.67	324.133	1256.85	196.296	30.1987	133.286	13.5763	62.1286	10.5156	23.8601
Ap2	TTG-43 AP	0.203	0.11	0.249	0.084	0.135	53.009	0.076	0.074	43.464	0.104	0.549	1.861	99.918	-11.2838	1138.59	-13.415	2.13116	5490	4.81427	0.00363721	0.00595467	0.00969263	0.00343906	0.00772714	0.0124905	4.85357	3.11897	0.0172074	0.00661572	3.14279	0.0788679	0.498896	0.422236	0.746769	0.907493	218.888	1254.01	1452.96	3667.82	472.052	2016.07	388.177	19.6991	333.905	42.9837	227.139	43.0231	106.49
Ap2	TTG-43 AP	0.19	0	0.282	0.155	0.11	53.574	0.064	0.076	42.299	0.123	0.463	1.784	99.12	-11.2156	1138.59	-13.415	2.19933	4630	4.88587	0.0037511	0.0110336	0.00793064	0	0.00878772	0.0105622	4.92419	3.04803	0.0161726	0.00785699	3.07206	0.0667908	0.480249	0.45296	0.79778	0.855665	1023.27	340.918	1573.9	3139.99	352.371	1379.24	222.8	32.9645	148.393	15.916	72.2139	12.5495	27.5688
Ap2	TTG-43 AP	0.064	0.183	0.339	0.048	0.035	53.925	0.124	0.04	42.932	0.124	0.37	2.191	100.375	-10.4317	1138.59	-13.415	2.98327	3700	4.87548	0.00195724	0.0033874	0.00250163	0.00569567	0.0104729	0.0202878	4.91782	3.06697	0.00540065	0.00785257	3.08022	0.0529147	0.584726	0.362359	0.643759	1.00606	997.985	373.759	1642.56	3323.17	384.773	1545.17	254.323	36.7599	178.035	18.2981	82.0158	14.1992	30.6874
Ap2	TTG-43 AP	2.647	0.135	0.424	1.166	0.05	51.729	0.322	0.079	39.232	0.137	0.554	1.806	98.281	-10.1931	1138.59	-13.415	3.22186	5540	4.75253	0.00392803	0.0836156	0.00363152	0.00426964	0.0133105	0.0535343	4.91089	2.84795	0.226978	0.00881606	3.08518	0.0805097	0.48977	0.429721	0.751288	0.885462	847.806	257.142	1335.6	2540.76	261.484	966.942	138.223	33.7689	94.9344	10.726	52.523	9.63121	23.4096
Ap2	TTG-43 AP	0.179	0.164	0.44	0.596	0.086	54.58	0.207	0.097	42.387	0.15	0.569	1.684	101.139	-12.0507	1138.59	-13.415	1.36426	5690	4.87808	0.00469185	0.0415776	0.00607633	0.00504575	0.0134371	0.0334789	4.9777	2.99329	0.0149316	0.00939009	3.01761	0.0804405	0.444264	0.475296	0.854201	0.837476	579.347	540.742	2300.88	4114.18	420.753	1607.2	241.596	35.5706	184.542	20.9259	105.322	19.9646	49.6725
Ap2	TTG-43 AP	0.076	0.15	0.443	0.057	0.11	53.087	0.088	0	42.986	0.017	0.544	1.849	99.407	-11.4542	1138.59	-13.415	1.96073	5440	4.84653	0	0.00406177	0.00793894	0.00471412	0.0138817	0.0145382	4.89166	3.10078	0.00647583	0.00108706	3.10834	0.0785577	0.498267	0.423175	0.744541	0.901312	844.83	279.643	1484.92	2800.5	285.316	1037.47	148.596	35.8918	102.181	11.1721	55.7146	10.3327	24.9265
Ap2	TTG-43 AP	0.346	0.19	0.44	0.125	0.1	53.62	0.151	0.003	42.456	0.043	0.565	1.069	99.108	-11.6758	1138.59	-13.415	1.73918	5650	4.85785	0.000147094	0.00883944	0.00716216	0.00717318	0.022908	0.0247559	4.92868	3.03918	0.0292572	0.00272865	3.07117	0.0809678	0.285876	0.633156	1.12255	0.577614	1116.37	348.199	1705	3438.37	397.564	1650.16	271.742	37.0207	185.219	17.8051	77.8747	13.3456	30.609
1Estimated from apatite Mn contents using the equation (logfO2 = -0.0022(±0.0003)Mn (ppm)–9.75(±0.46)) of Miles et al. (2014)
2The FMQ values were calculated following the equation of Myers and Eugster (1983): log fO2 = –24,441.9/T (K) + 8.290 (±0.167)
3Melt Cl concentrations are calculated based on and DClapatite/melt=1 from Webster et al. (2009), where DClapatite/melt are apatite-melt partition coefcients for Cl.
[truncated: 11 more columns]

## Sheet: Major elemens standrd materials
Major element compositions of Durango and Madagascar apatite
spot	Na2O(wt%)	SiO2(wt%)	CaO(wt%)	P2O5(wt%)	SO3(wt%)	FeO(wt%)	MnO(wt%)	V2O3(wt%)	SrO(wt%)	As2O5(wt%)	MgO(wt%)	La2O3(wt%)	Ce2O3(wt%)	Cl(wt%)	F(wt%)	Total
Madagascar apatite	0.06	0.79	54.89	39.408	0.703	0.033	0	0.041	0.188	0	0.005	0.205	0.37	0.153	4.122	100.968
Madagascar apatite	0.066	0.787	54.814	39.479	0.703	0	0	0	0.23	0.024	0	0.195	0.412	0.142	3.987	100.839
Madagascar apatite	0.052	0.822	54.963	39.168	0.893	0.032	0.034	0.025	0.252	0	0	0.186	0.381	0.145	3.989	100.942
Madagascar apatite	0.063	0.781	54.668	39.523	0.694	0.007	0.023	0	0.283	0	0	0.174	0.375	0.148	4.136	100.875
Madagascar apatite	0.062	0.716	54.812	40.201	0.722	0	0	0.034	0.235	0	0	0.214	0.402	0.152	3.796	101.346
Madagascar apatite	0.055	0.63	55.193	40.127	0.723	0.032	0	0.023	0.211	0	0	0.182	0.393	0.143	4.077	101.789
Madagascar apatite	0.057	0.795	54.813	39.32	0.693	0	0.009	0.011	0.213	0.011	0.004	0.173	0.374	0.139	3.63	100.242
Madagascar apatite	0.051	0.765	54.488	39.492	0.698	0.024	0.017	0	0.257	0	0.013	0.206	0.378	0.152	3.83	100.371
Madagascar apatite	0.056	0.768	54.928	39.791	0.677	0.021	0	0.028	0.198	0	0	0.18	0.395	0.152	3.533	100.727
Madagascar apatite	0.058	0.818	54.935	39.6	0.604	0	0	0	0.211	0.002	0	0.203	0.383	0.144	3.665	100.623
Madagascar apatite	0.057	0.782	54.917	38.907	0.705	0.006	0.034	0.043	0.214	0	0	0.204	0.402	0.138	3.56	99.969
Madagascar apatite	0.063	0.835	55.385	38.913	0.683	0	0.022	0	0.172	0	0.003	0.181	0.408	0.128	3.998	100.791
Madagascar apatite	0.05	0.73	55.076	38.802	0.702	0.012	0.022	0	0.245	0.012	0.011	0.154	0.387	0.116	4.113	100.432
Madagascar apatite	0.05	0.496	54.42	39.473	0.714	0	0	0	0.199	0	0	0.148	0.395	0.152	3.839	99.886
Madagascar apatite	0.069	0.643	55.25	40.094	0.683	0.012	0.007	0.01	0.245	0	0	0.2	0.402	0.144	3.973	101.732
Madagascar apatite	0.056	0.632	55.142	39.354	0.652	0.008	0	0.032	0.255	0	0	0.217	0.415	0.148	4.073	100.984
Madagascar apatite	0.048	0.65	54.493	40.806	0.615	0.019	0.01	0	0.244	0.006	0	0.187	0.41	0.147	3.72	101.355
Madagascar apatite	0.058	0.798	55.523	39	0.633	0	0	0.006	0.177	0	0	0.173	0.39	0.141	4.05	100.949
Madagascar apatite	0.055	0.82	55.412	39.524	0.712	0.036	0.014	0	0.22	0.011	0.012	0.183	0.385	0.158	4	101.542
Madagascar apatite	0.052	0.801	55.847	39.476	0.7	0	0	0.009	0.234	0.002	0	0.215	0.41	0.13	3.923	101.799
Durango apatite	0.21	0.407	54.459	40.52	0.359	0.029	0.002	0.031	0.031	0.14	0	0.438	0.59	0.34	3.342	100.898
Durango apatite	0.202	0.421	54.347	41.146	0.318	0.022	0	0	0.02	0.185	0.015	0.38	0.641	0.379	3.376	101.452
Durango apatite	0.211	0.36	54.675	40.497	0.39	0.018	0.02	0	0.023	0.13	0	0.432	0.632	0.378	3.367	101.133
Durango apatite	0.189	0.353	53.838	40.334	0.368	0.036	0	0	0.084	0.15	0.023	0.476	0.577	0.36	3.325	100.113
Durango apatite	0.215	0.357	54.376	40.977	0.324	0.043	0.017	0.013	0.042	0.167	0	0.479	0.545	0.379	3.363	101.297
Durango apatite	0.23	0.398	54.323	40.853	0.359	0	0	0.028	0.042	0.11	0	0.438	0.578	0.389	3.32	101.068
Durango apatite	0.205	0.393	54.902	41.288	0.344	0	0	0	0.057	0.214	0	0.394	0.603	0.366	3.28	102.046
Durango apatite	0.221	0.363	54.582	40.802	0.326	0.039	0	0	0.054	0.103	0	0.482	0.564	0.361	3.40841	101.305
Durango apatite	0.175	0.412	54.44	40.08	0.352	0.051	0.006	0	0.048	0.137	0.014	0.452	0.553	0.432	3.436	100.588
Durango apatite	0.151	0.413	54.352	41.146	0.323	0	0.006	0	0.055	0.198	0	0.4	0.527	0.41	3.02	101.001
Durango apatite	0.177	0.37	54.522	41.633	0.344	0.034	0.042	0.023	0.068	0.154	0	0.432	0.612	0.419	3.325	102.155
Durango apatite	0.184	0.389	54.098	40.618	0.368	0.032	0.003	0	0.028	0.169	0.002	0.417	0.533	0.393	3.25	100.484
Durango apatite	0.274	0.363	54.355	40.208	0.328	0.042	0	0	0.025	0.172	0.011	0.421	0.631	0.41	3.38	100.62
Durango apatite	0.144	0.353	54.665	40.462	0.343	0.038	0.035	0	0.045	0.164	0	0.423	0.618	0.429	3.048	100.767
Durango apatite	0.231	0.4	54.37	40.524	0.376	0.039	0.033	0	0.038	0.133	0.004	0.383	0.554	0.432	3.07	100.587
Durango apatite	0.187	0.349	54.15	40.972	0.307	0.043	0.016	0.009	0.077	0.172	0	0.443	0.589	0.392	3.235	100.941
Durango apatite	0.2	0.382	54.643	40.216	0.341	0.04	0	0	0.033	0.153	0	0.443	0.627	0.435	3.283	100.796
Durango apatite	0.197	0.375	55.082	40.384	0.349	0.02	0.034	0.01	0.063	0.202	0	0.477	0.592	0.43	3.377	101.592
Durango apatite	0.221	0.345	54.832	40.641	0.313	0	0.029	0.021	0.031	0.166	0.004	0.425	0.617	0.412	3.41788	101.475
Durango apatite	0.2	0.382	54.366	40.568	0.348	0.038	0.006	0.034	0.069	0.163	0.01	0.447	0.543	0.426	3.33	100.93

## Sheet: Trace elements standard materia
Trace elements concentrations of Durango and Madagascar apatite
spot	Sr	Y	La	Ce	Pr	Nd	Sm	Eu	Gd	Tb	Dy	Ho	Er	Tm	Yb	Lu	Th	U	Zr
	ppm	ppm	ppm	ppm	ppm	ppm	ppm	ppm	ppm	ppm	ppm	ppm	ppm	ppm	ppm	ppm	ppm	ppm	ppm
Durango apatite	522.403	813.718	3705	5245.6	462.229	1497.4	221.12	18.3519	193.153	23.0434	130.397	25.1207	71.3	9.26	49.5	6.05	271.3	13.27	1.23457
Durango apatite	518.33	816.9	3702.26	5196.44	438.797	1529.84	217.658	19.2898	183.378	23.0953	135.62	25.9217	72.6518	9.11	51.18	6.64	267.2	13.25	1.31128
Durango apatite	520.607	809.1	3694.23	5234.05	434.391	1558.99	214.061	18.5091	192.538	22.7664	130.701	27.4885	70.5158	8.93	46.1489	6.15	258.89	13.4587	1.45494
Durango apatite	517.4	828.351	3716.02	5187.9	453.101	1545.1	216.288	18.4884	190.058	24.5094	136.717	28.0773	73.1506	8.88	48.5075	6.39	261.1	12.89	1.1243
Durango apatite	518.366	837.728	3733.21	5196.11	438.661	1558.97	225.249	18.2453	193.271	24.1629	142.148	27.7188	75.1309	9.49595	49.8154	6.73833	264.92	13.2108	1.38523
Durango apatite	519.5	836	4150.64	5226.52	438.358	1548.85	219.705	18.628	202.077	22.8488	143.407	30.8873	83.2086	9.79	50.5	6.61	321	13.0714	1.27317
Durango apatite	513.355	836.569	3758.93	5176.89	415.17	1588.7	198.224	19.6089	196.522	22.8518	142.408	28.7961	70.4118	9.3872	49.3591	6.53518	252.8	13.3649	1.23064
Durango apatite	513.226	883.875	3824.85	5075.15	417.62	1514.36	223.579	18.8875	193.411	24.5144	134.865	28.5886	73.8463	8.96	49.7634	7.09717	283.5	13.4012	1.25235
Durango apatite	517.024	846	3916.28	5169.63	439.89	1532.91	216.8	17.8996	193.411	23.0404	142.673	27.0458	76.6146	9.04	49.3	5.99	276.9	13.6269	1.47664
Durango apatite	513.1	829	3945.18	5008.44	456.987	1518.59	222.383	18.0458	198.821	24.2949	139.55	32.0379	79.5916	9.36	49.4	5.61	310	13.1396	1.34026
Durango apatite	521.758	834.6	3893.6	5178.19	447.721	1512.61	208.178	18.4719	198.936	25.6389	146.887	30.6166	76.9573	9.07215	47.6	5.37	304.2	13.6518	1.35067
Durango apatite	521.3	898.341	4059.47	5320.76	448.559	1516.35	223.7	17.9516	202.49	23.7474	143.065	29.2258	75.9945	9.3736	51.1	5.58	293.9	13.6222	1.2965
Durango apatite	511.1	837	3762.93	5148.92	406.06	1505.48	199.324	18.9064	203.448	24.8629	144.507	27.9725	76.9355	9.23875	52.5	5.11	295.386	13.3722	1.27862
Durango apatite	529.963	845.9	3996.27	4998.08	460.138	1458.9	195.751	18.2759	200.076	25.2765	141.629	30.0492	78.4083	9.62121	51.5	6.74115	281.8	12.9387	1.50343
Durango apatite	536.426	948.884	3986.53	5112.96	436.665	1558	215	18.9939	203.563	25.2735	151.531	29.3921	79.7176	9.8349	55.33	6.37258	300.3	14.1433	1.32912
Durango apatite	519.8	909.864	3894.55	5270.94	459.865	1572.56	224.396	18.3657	189.127	23.6184	134.88	30.0792	75.4762	9.93	53.1	6.82026	264.9	12.6237	1.417
Durango apatite	523.834	903.578	4096.14	5245.77	433.283	1359.36	227.374	18.7774	188.627	24.1659	146.274	28.9372	75.1424	10.2011	52.33	5.95	285.3	12.3305	1.4232
Durango apatite	521.1	853.492	3925.12	5324.64	442.032	1423.57	196.995	17.5944	183.763	24.7046	142.837	28.38	78.5395	9.66415	48.5	5.63	253.7	12.8162	1.33759
Durango apatite	521.8	840	3850.65	4958.7	446.93	1386.48	215.9	17.6103	183.263	24.2979	141.591	27.2287	78.8659	9.536	55.3029	5.61	261.3	12.49	1.15778
Durango apatite	545.446	910.321	3752.14	5315.43	435.465	1397.36	215.5	17.7005	193.038	23.0983	143.02	30.3752	84.014	9.91548	50.9	6.12	282.1	11.7729	1.2388
Madagascar apatite	2139.06	277.849	1553.7	3504.83	404.307	1558.06	212.676	28.7752	123.849	12.7162	59.4333	10.1486	24.2976	2.79336	15.341	1.93398	472.183	18.1723	9.9851
Madagascar apatite	2152.48	279.642	1564.55	3488.93	405.716	1553.9	211.576	28.6983	126.885	12.4666	60.0504	10.0625	23.542	2.8776	15.5704	1.95258	476.887	18.3791	9.81747
Madagascar apatite	2160.49	278.565	1553.19	3492.11	401.007	1553.57	213.886	28.7479	127.182	12.4642	59.4276	9.86751	23.8383	2.76555	15.1214	1.93243	472.227	18.271	10.9625
Madagascar apatite	2140.44	273.601	1560.92	3485.32	397.575	1524.89	210.046	29.1382	123.438	11.93	59.0811	9.70866	23.7482	2.7466	14.8929	1.82658	459.972	18.178	9.96328
Madagascar apatite	2149.31	276.522	1568.41	3515.74	400.467	1533.34	208.235	28.9528	125.426	12.2344	60.7805	9.9523	24.0357	2.84415	14.9664	1.88932	466.981	18.3206	10.0364
Madagascar apatite	2154.74	279.429	1572.77	3512.11	401.12	1547.13	210.073	28.6415	123.432	12.1312	59.342	9.96433	23.8457	2.73819	15.1445	1.93482	468.496	18.181	9.75082
Madagascar apatite	2146.12	320.489	1851.8	3724.2	425.748	1530	203.892	31.1351	131.949	13.9332	66.1474	10.7701	26.0029	3.12226	16.8705	2.42179	662.068	20.1092	11.4501
Madagascar apatite	2129.68	319.983	1850.68	3710.95	426.63	1532.09	204.794	31.7393	131.24	14.2887	65.4376	10.672	26.2267	3.05478	17.3594	2.58541	662.159	20.1612	11.1875
Madagascar apatite	2123.76	315.426	1837.74	3778.19	426.88	1497.5	198.517	30.1434	126.897	13.3821	64.0432	10.584	25.4531	3.04874	16.0723	2.47459	635.851	20.6424	10.0051
Madagascar apatite	2123.48	317.079	1817.73	3688.49	423.862	1489.22	198.119	31.2441	123.985	13.737	63.9807	10.4163	25.4991	3.01983	15.837	2.58483	635.917	20.4705	10.4376
Madagascar apatite	2144.74	316.738	1810.39	3805.33	428.384	1545.96	200.384	31.0027	136.66	14.2433	68.1503	10.9867	25.688	3.10021	18.3008	2.32475	650.075	20.9505	10.6863
Madagascar apatite	2109.84	307.442	1767.05	3707.86	425.006	1518.8	195.006	29.8603	132.005	13.3822	64.5579	10.9642	25.1007	3.13289	17.791	2.36908	643.093	20.6093	10.264
Madagascar apatite	2145.83	308.804	1788.2	3702.93	416.484	1533.27	191.379	29.9764	128.588	13.7826	66.0224	10.8465	25.3376	2.91436	17.0386	2.25316	627.425	19.7565	9.97298
Madagascar apatite	2145.27	319.165	1808.94	3780.34	420.728	1534.73	202.868	30.9064	127.788	13.393	64.5134	11.1998	25.8833	3.19446	18.4403	2.2937	645.293	20.4563	11.8264
Madagascar apatite	2131.79	317.349	1784.42	3747.87	414.392	1498.46	199.583	30.0009	126.682	13.2657	64.5291	11.2198	26.0769	3.09125	18.2172	2.23149	635.04	20.2061	11.2821
Madagascar apatite	2123.02	320.563	1808.8	3748.32	421.636	1515.19	200.38	31.1008	123.913	13.2079	66.046	11.3468	26.3885	3.29957	18.4744	2.17319	641.708	20.7512	12.0708
Madagascar apatite	2125.96	322.545	1801.81	3754.82	423.524	1520.97	201.704	31.0825	124.78	13.4112	63.3092	11.3877	26.7132	3.17633	19.0406	2.1947	641.492	20.2934	10.6245
Madagascar apatite	2098.47	312.319	1579.64	3394.02	383.173	1428.97	190.854	29.6394	126.539	14.0229	66.9765	10.9515	27.1861	3.04162	17.6214	2.71104	523.744	16.0181	9.83444
Madagascar apatite	2116.71	314.83	1611.57	3466.89	391.641	1459.1	197.961	29.9632	128.654	14.0713	68.3117	11.3424	28.413	3.08623	17.4077	2.79239	539.136	16.2604	10.3997
Madagascar apatite	2122.27	319.704	1609.85	3427.1	392.203	1460.27	196.816	30.462	127.544	13.966	68.2145	11.3879	27.7857	3.09055	18.0037	2.78278	540.385	16.3287	10.8403
